# Supplementary material for: Surface wrinkling in liquid crystal elastomers
Source: Royal Society of Chemistry journal article supplement (doi:10.1039/c2sm25734c), 2012-01-01
Supplement: c2sm25734c.pdf [file c2sm25734c.pdf]

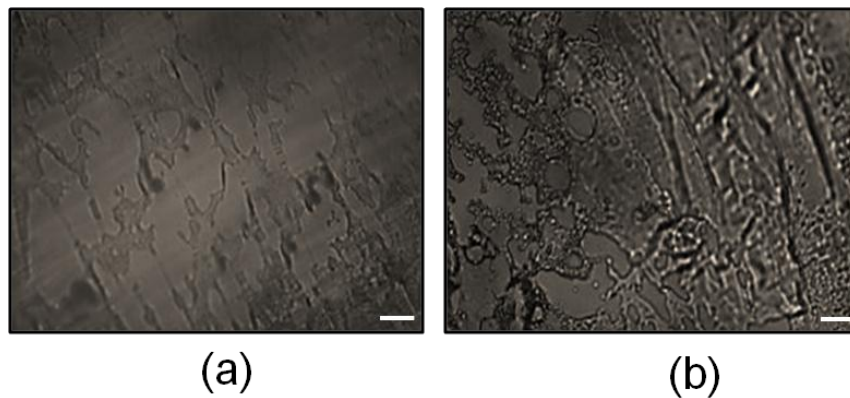

S1: Optical microscopy images of PS-LCE bilayer system showing (a) cracking and (b) delamination of the PS film at high strains.

S2: Video showing bilayer curling and uncurling in real-time (see attached video file)
